# Supplementary material for: Nanofibrillated cellulose as the support and reductant for the facile synthesis of Fe3O4/Ag nanocomposites with catalytic and antibacterial activity
Source: Royal Society of Chemistry journal article supplement (doi:10.1039/c3ta13314a), 2013-01-01
Supplement: c3ta13314a.pdf [file c3ta13314a.pdf]

**Nanofibrillated cellulose as support and reductant for facile synthesis  
of Fe<sub>3</sub>O<sub>4</sub>/Ag nanocomposites with catalytic and antibacterial  
activities**

**Rui Xiong, Canhui Lu, Yaru Wang, Zehang Zhou and Xinxing Zhang\***

*State Key Laboratory of Polymer Materials Engineering, Polymer Research Institute of Sichuan*

*University, Chengdu 610065, China*

---

*\*Corresponding author: Xinxing Zhang*

*E-mail address: [xxzwwh@scu.edu.cn](mailto:xxzwwh@scu.edu.cn)*

*Tel: +86-28-85460607 Fax: +86-28-85402465*

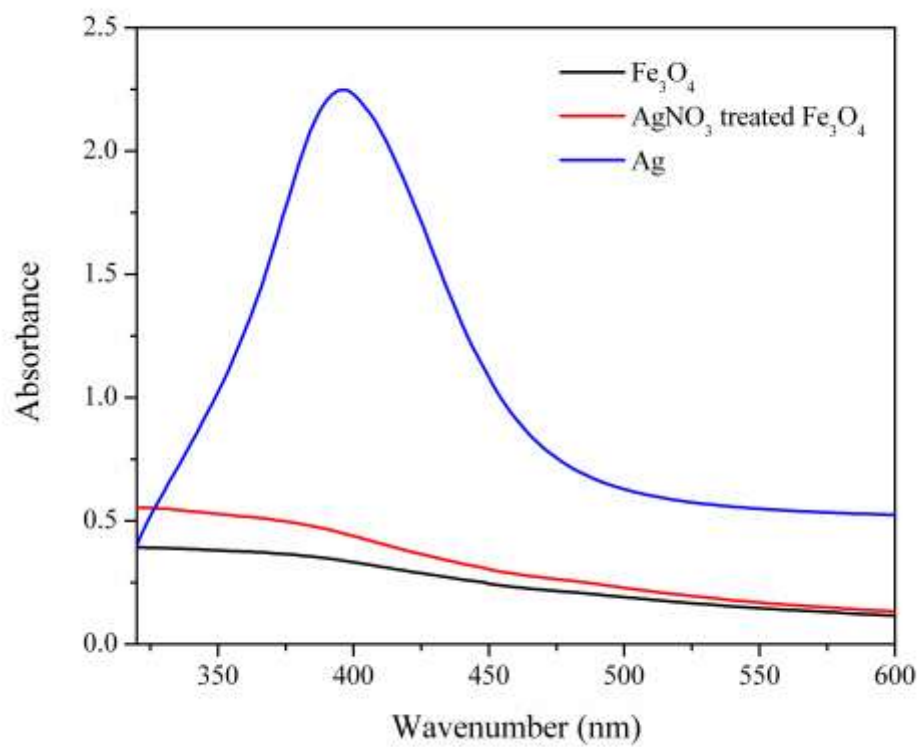

Fig. S1. The UV-vis spectra of Fe<sub>3</sub>O<sub>4</sub> NPs, AgNO<sub>3</sub> treated Fe<sub>3</sub>O<sub>4</sub> NPs and Ag NPs.

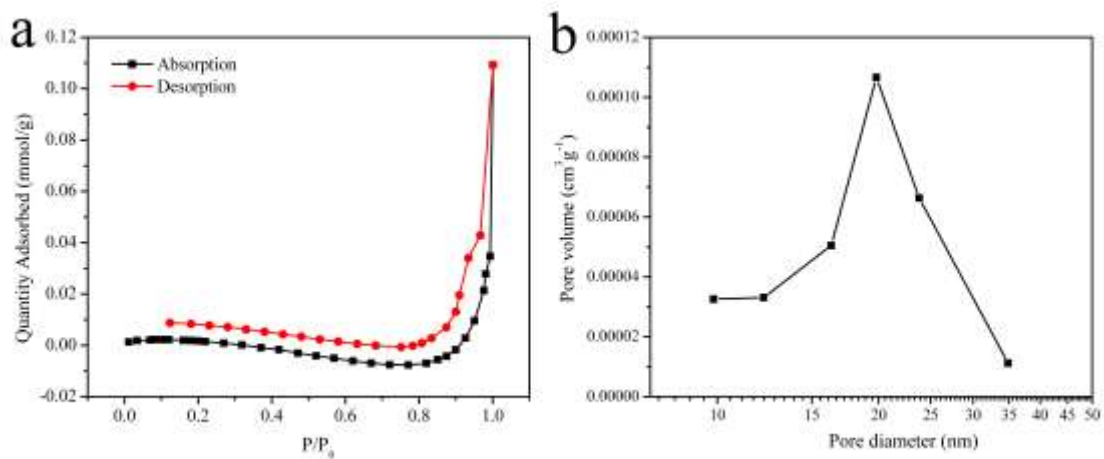

Fig. S2. The magnified nitrogen adsorption isotherm (a) and pore size distribution (b) of  $\text{Fe}_3\text{O}_4/\text{Ag}@\text{NFC}$  film.
